# Supplementary material
Source: PubMed Central journal article supplement (PMC3288163)
Supplement: NIHMS349740-supplement-Supporting_Info.pdf [file NIHMS349740-supplement-Supporting_Info.pdf]

Supporting Information for

**Evaluating the Identity and Diiron Core Transformations of a  
( $\mu$ -Oxo)diiron(III) Complex Supported by an Electron-Rich  
Tris(pyridyl-2-methyl)amine Ligand**

*Loi H. Do<sup>†</sup>, Genqiang Xue<sup>‡</sup>, Lawrence Que, Jr.<sup>‡\*</sup> Stephen J. Lippard<sup>†\*</sup>*

<sup>†</sup>Department of Chemistry, Massachusetts Institute of Technology, Cambridge, MA 02139;  
[lippard@mit.edu](mailto:lippard@mit.edu)

<sup>‡</sup>Department of Chemistry and Center for Metals in Biocatalysis, University of Minnesota,  
Minneapolis, MN 55455; [larryque@umn.edu](mailto:larryque@umn.edu)

| <b><u>Table of Contents</u></b>                                                                                                                  | <b><u>Page(s)</u></b> |
|--------------------------------------------------------------------------------------------------------------------------------------------------|-----------------------|
| <b>Table S1.</b> X-ray data for <b>2</b> , <b>10a</b> , and <b>10b</b> .                                                                         | S2                    |
| <b>Table S2.</b> Structural comparison of <b>10a</b> and <b>10b</b> .                                                                            | S3                    |
| <b>Figure S1.</b> UV-vis spectra of <b>2</b> , <b>10a</b> , and <b>10b</b> .                                                                     | S4                    |
| <b>Figure S2.</b> Thermal ellipsoid diagram of <b>10b</b> .                                                                                      | S5                    |
| <b>Figure S3.</b> UV-vis spectra of <b>2</b> in CH <sub>2</sub> Cl <sub>2</sub> , CH <sub>3</sub> CN, and CH <sub>3</sub> CN/CH <sub>3</sub> OH. | S6                    |
| <b>Figure S4.</b> Effect of temperature and water on the UV-vis spectrum of <b>2</b> .                                                           | S7                    |
| <b>Figure S5.</b> Reaction of <b>2</b> in wet CH <sub>3</sub> CN.                                                                                | S8                    |
| <b>Figure S6.</b> Reaction of <b>2</b> with hydrogen peroxide with and without water.                                                            | S9                    |
| <b>Figure S7.</b> Reaction of <b>2</b> with hydrogen peroxide in acetone.                                                                        | S10                   |
| <b>Figure S8.</b> Reaction of <b>2</b> with hydrogen peroxide in CH <sub>2</sub> Cl <sub>2</sub> /CH <sub>3</sub> CN.                            | S11                   |

**Table S1.** X-ray Data Collection and Refinement Parameters for **2**, **10a**, and **10b**.

|                                                 | <b>2</b>                                                                                                                                             | <b>10a</b>                                                                                                                                           | <b>10b</b>                                                                                                                                                                                               |
|-------------------------------------------------|------------------------------------------------------------------------------------------------------------------------------------------------------|------------------------------------------------------------------------------------------------------------------------------------------------------|----------------------------------------------------------------------------------------------------------------------------------------------------------------------------------------------------------|
| Empirical formula                               | [Fe <sub>2</sub> N <sub>8</sub> O <sub>8</sub> C <sub>54</sub> H <sub>72</sub> ](ClO <sub>4</sub> ) <sub>3</sub> · (CH <sub>3</sub> CN) <sub>4</sub> | [Fe <sub>2</sub> N <sub>8</sub> O <sub>9</sub> C <sub>56</sub> H <sub>75</sub> ](ClO <sub>4</sub> ) <sub>3</sub> · (CH <sub>3</sub> CN) <sub>3</sub> | [Fe <sub>2</sub> N <sub>8</sub> O <sub>9</sub> C <sub>56</sub> H <sub>75</sub> ](ClO <sub>4</sub> ) <sub>3</sub> · (CH <sub>3</sub> CN) <sub>2.5</sub> (C <sub>4</sub> H <sub>10</sub> O) <sub>0.5</sub> |
| Formula weight                                  | 1535.46                                                                                                                                              | 1537.45                                                                                                                                              | 1548.94                                                                                                                                                                                                  |
| Temperature (K)                                 | 100                                                                                                                                                  | 100                                                                                                                                                  | 100                                                                                                                                                                                                      |
| Wavelength (Å)                                  | 0.71073                                                                                                                                              | 0.71073                                                                                                                                              | 0.71073                                                                                                                                                                                                  |
| Crystal system                                  | Monoclinic                                                                                                                                           | Triclinic                                                                                                                                            | Triclinic                                                                                                                                                                                                |
| Space group                                     | C2/c                                                                                                                                                 | P $\bar{1}$                                                                                                                                          | P $\bar{1}$                                                                                                                                                                                              |
| Unit cell dimensions                            | a = 28.2258(19) Å<br>b = 11.7652(8) Å<br>c = 22.4938(15) Å<br><br>β = 106.6850(10)°                                                                  | a = 13.6256(9) Å<br>b = 14.0402(9) Å<br>c = 20.2928(13) Å<br>α = 81.2320(10)°<br>β = 72.8600(10)°<br>γ = 71.0910(10)°                                | a = 13.6723(12) Å<br>b = 22.640(2) Å<br>c = 24.640(2) Å<br>α = 99.8960(10)°<br>β = 98.875(2)°<br>γ = 102.9360(10)°                                                                                       |
| Volume (Å <sup>3</sup> )                        | 7155.3(8)                                                                                                                                            | 3503.6(4)                                                                                                                                            | 7135.5(11)                                                                                                                                                                                               |
| Z                                               | 2                                                                                                                                                    | 2                                                                                                                                                    | 2                                                                                                                                                                                                        |
| Calculated density (g/mm <sup>3</sup> )         | 1.425                                                                                                                                                | 1.458                                                                                                                                                | 1.442                                                                                                                                                                                                    |
| Absorption coefficient (mm <sup>-1</sup> )      | 0.596                                                                                                                                                | 0.610                                                                                                                                                | 0.600                                                                                                                                                                                                    |
| F(000)                                          | 3212                                                                                                                                                 | 1600                                                                                                                                                 | 3236                                                                                                                                                                                                     |
| Crystal size (mm <sup>3</sup> )                 | 0.32 x 0.17 x 0.13                                                                                                                                   | 0.20 x 0.10 x 0.07                                                                                                                                   | 0.20 x 0.16 x 0.12                                                                                                                                                                                       |
| Θ range for data collection                     | 1.51 to 26.73°                                                                                                                                       | 1.54 to 26.41°                                                                                                                                       | 1.14 to 26.77°                                                                                                                                                                                           |
| Index ranges                                    | -35 ≤ h ≤ 35<br>-14 ≤ k ≤ 14<br>-20 ≤ l ≤ 20                                                                                                         | -16 ≤ h ≤ 17<br>-17 ≤ k ≤ 17<br>-25 ≤ l ≤ 25                                                                                                         | -17 ≤ h ≤ 17<br>-28 ≤ k ≤ 28<br>-30 ≤ l ≤ 30                                                                                                                                                             |
| Reflections collected                           | 63728                                                                                                                                                | 61129                                                                                                                                                | 123942                                                                                                                                                                                                   |
| Independent reflections                         | 7549<br>[R(int) = 0.0340]                                                                                                                            | 14283<br>[R(int) = 0.0532]                                                                                                                           | 30171<br>[R(int) = 0.0564]                                                                                                                                                                               |
| Completeness to Θ (%)                           | 99.3                                                                                                                                                 | 99.4                                                                                                                                                 | 99.1                                                                                                                                                                                                     |
| Absorption correction                           | Empirical                                                                                                                                            | Empirical                                                                                                                                            | Empirical                                                                                                                                                                                                |
| Max. and min. transmission                      | 0.9265 and 0.8321                                                                                                                                    | 0.9586 and 0.8878                                                                                                                                    | 0.9315 and 0.8895                                                                                                                                                                                        |
| Data / restraints / parameters                  | 7549/85/473                                                                                                                                          | 14283/0/952                                                                                                                                          | 30171/4/1808                                                                                                                                                                                             |
| Goodness-of-fit on F <sup>2</sup>               | 1.077                                                                                                                                                | 1.016                                                                                                                                                | 1.030                                                                                                                                                                                                    |
| Final R indices [I>2σ(I)]                       | R1 = 0.0652<br>wR2 = 0.1759                                                                                                                          | R1 = 0.0552<br>wR2 = 0.1259                                                                                                                          | R1 = 0.0673<br>wR2 = 0.1747                                                                                                                                                                              |
| R indices (all data)                            | R1 = 0.0722<br>wR2 = 0.1815                                                                                                                          | R1 = 0.0810<br>wR2 = 0.1381                                                                                                                          | R1 = 0.0967<br>wR2 = 0.1937                                                                                                                                                                              |
| Largest diff. peak and hole (eÅ <sup>-3</sup> ) | 1.828 and -0.693                                                                                                                                     | 1.429 and -1.188                                                                                                                                     | 2.467 and -1.199                                                                                                                                                                                         |

\* R1 =  $\sum ||F_o| - |F_c|| / \sum |F_o|$ ; wR2 =  $\{\sum [w(F_o^2 - F_c^2)^2] / \sum [w(F_o^2)^2]\}^{1/2}$ ; GOF =  $\{\sum [w(F_o^2 - F_c^2)^2] / (n-p)\}^{1/2}$ , where  $n$  is the number of reflections and  $p$  is the total number of parameters refined.

**Table S2.** Selected Structural Parameters of **10a** and **10b**.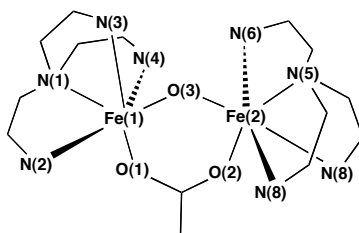

|                                       | <b>10a</b> | <b>10b<sup>b</sup></b> |
|---------------------------------------|------------|------------------------|
| <b>Bond Distances (Å)<sup>a</sup></b> |            |                        |
| Fe(1)–Fe(2)                           | 3.252(3)   | 3.250(3), 3.250(3)     |
| Fe(1)–O(1)                            | 2.044(2)   | 2.042(3), 2.038(3)     |
| Fe(1)–O(3)                            | 1.783(2)   | 1.794(3), 1.788(3)     |
| Fe(1)–N(1)                            | 2.212(3)   | 2.216(3), 2.221(3)     |
| Fe(1)–N(2)                            | 2.114(3)   | 2.137(3), 2.119(3)     |
| Fe(1)–N(3)                            | 2.128(3)   | 2.135(2), 2.131(3)     |
| Fe(1)–N(4)                            | 2.146(3)   | 2.138(3), 2.151(3)     |
| Fe(2)–O(2)                            | 1.962(2)   | 1.984(3), 1.966(3)     |
| Fe(2)–O(3)                            | 1.801(2)   | 1.808(3), 1.803(3)     |
| Fe(2)–N(5)                            | 2.182(3)   | 2.191(3), 2.191(3)     |
| Fe(2)–N(6)                            | 2.138(3)   | 2.121(3), 2.134(3)     |
| Fe(2)–N(7)                            | 2.228(3)   | 2.228(3), 2.233(3)     |
| Fe(2)–N(8)                            | 2.128(3)   | 2.131(3), 2.136(3)     |
| <b>Bond Angles (deg)<sup>a</sup></b>  |            |                        |
| Fe(1)–O(3)–Fe(2)                      | 130.15(13) | 128.98(15), 129.62(15) |
| O(3)–Fe(1)–O(1)                       | 98.47(10)  | 99.63(12), 99.39(12)   |
| O(3)–Fe(2)–O(2)                       | 102.39(10) | 102.14(12), 101.70(12) |
| N(1)–Fe(1)–N(2)                       | 77.70(10)  | 75.81(12), 76.58(12)   |
| N(1)–Fe(1)–N(3)                       | 79.20(10)  | 79.01(13), 78.95(13)   |
| N(1)–Fe(1)–N(4)                       | 75.07(10)  | 76.18(12), 75.59(12)   |
| N(5)–Fe(2)–N(6)                       | 76.09(10)  | 78.52(12), 77.11(13)   |
| N(5)–Fe(2)–N(7)                       | 77.98(10)  | 76.93(12), 77.49(12)   |
| N(5)–Fe(2)–N(8)                       | 76.69(10)  | 75.89(12), 76.98(12)   |

<sup>a</sup>A generalized numbering scheme, depicted in the above cartoon representation, is used. These atom labels do not necessarily correspond to those assigned in their respective X-ray structures. <sup>b</sup>There are two independent molecules of **10b** in the asymmetric unit; parameters of both cations are given.

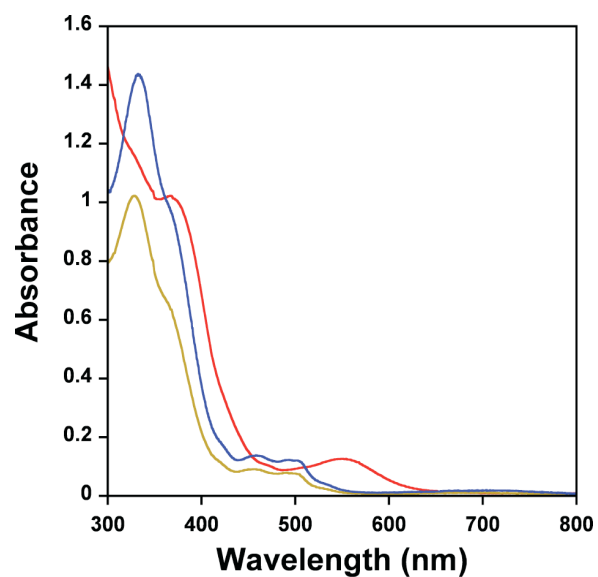

**Figure S1.** UV-vis spectra of complexes **2** (red), **10a** (yellow), and **10b** (blue) recorded in dichloromethane at RT. Red spectrum:  $\lambda_{\text{max}} = 370, 550$  nm; yellow spectrum:  $\lambda_{\text{max}} = 332, 454, 492$  nm; blue spectrum:  $\lambda_{\text{max}} = 332, 454, 492$  nm. The concentrations of **2**, **10a**, and **10b** are approximately 190, 89, and 58  $\mu\text{M}$ , respectively.

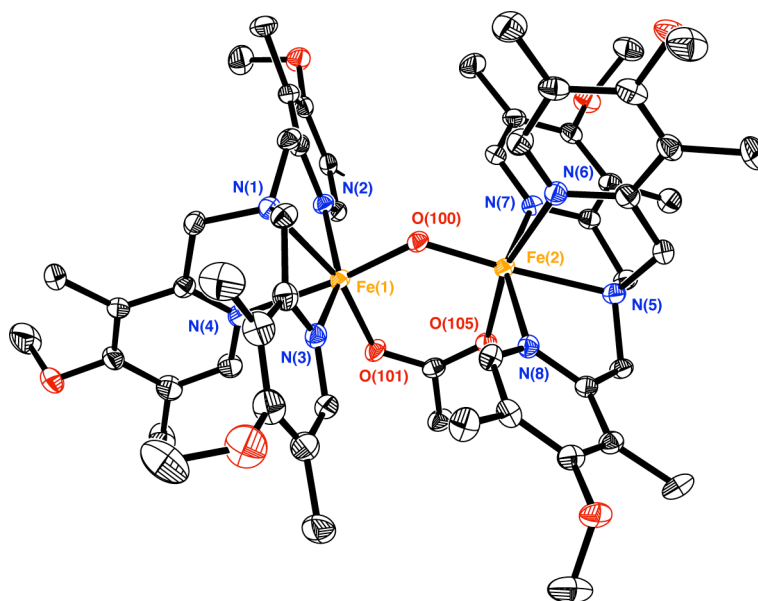

**Figure S2.** A thermal ellipsoid (50%) diagram of the X-ray structure of  $[\text{Fe}_2(\mu\text{-O})(\mu\text{-CH}_3\text{CO}_2)(\text{R}_3\text{TPA})_2](\text{ClO}_4)_3 \cdot (\text{CH}_3\text{CN})_{2.5}(\text{Et}_2\text{O})_{0.5}$  (**10b**). Two independent molecules of **10b** occur in the asymmetric unit. Hydrogen atoms, solvent molecules, and perchlorate anions are omitted for clarity. Color scheme: iron, orange; oxygen, red; nitrogen, blue; carbon, black. See Tables S1 and S2 for data refinement and structural parameters of **10b**, respectively.

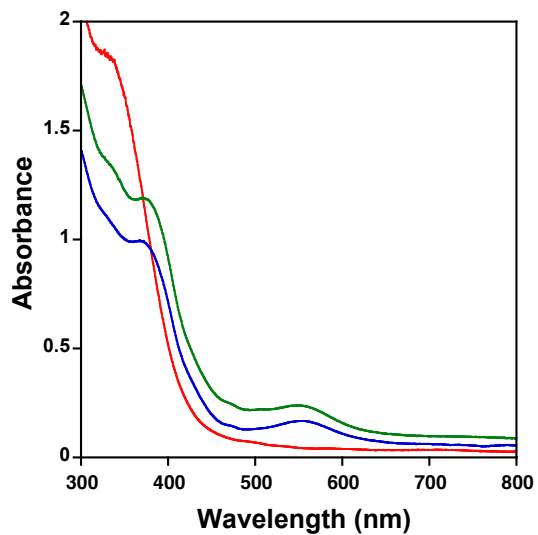

**Figure S3.** UV-vis spectra of complex **2** recorded in different solvents. The 375 and 550 nm bands are observed in dichloromethane (green) and acetonitrile (blue) but not in a dichloromethane/methanol (1:1) mixture. The diamond core in **2** is maintained only in non-protic solvents.

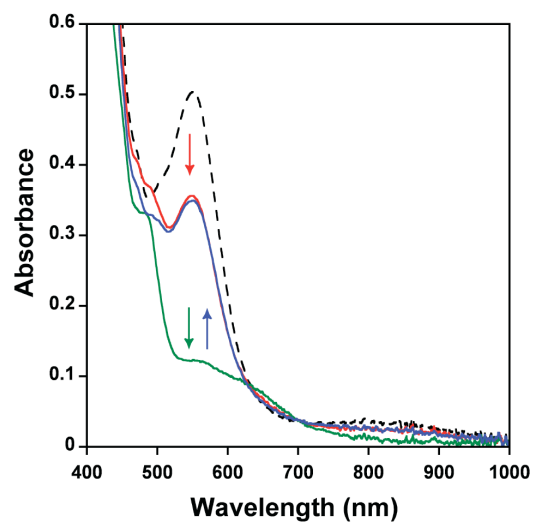

**Figure S4.** Plot showing the effect of temperature and water on the UV-vis spectrum of a 0.7 mM acetonitrile solution of complex **2**. At RT, **2** displays a prominent band at 550 nm (dashed line). When cooled to -30 °C, this absorption decreases (red) and completely disappears upon addition of ~8,000 equiv of water (green) vs the diiron complex. The band at 550 nm is partially restored upon warming the solution back to RT (blue).

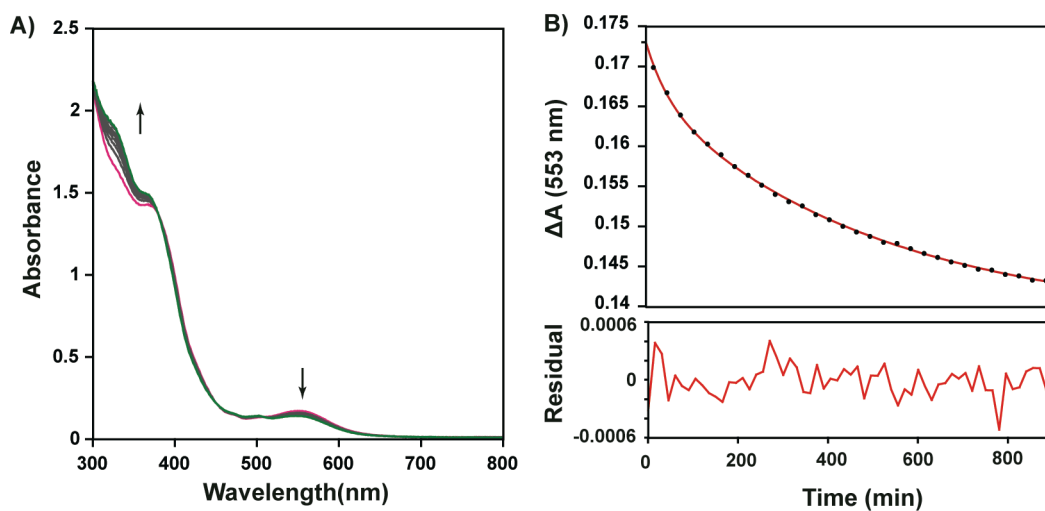

**Figure S5.** Reaction of **2** in acetonitrile (283  $\mu\text{M}$ ) (solvent-grade, not pre-dried) at RT followed by UV-vis absorption spectroscopy. The complete optical profile is shown in panel A. The absorption changes at 553 nm are shown in panel B as black dots. The data were fit to an  $\text{A} \rightarrow \text{B} \rightarrow \text{C}$  kinetic model (red trace), yielding the parameters:  $k_1 = 2.04 \pm 0.16 \times 10^{-2} \text{ min}^{-1}$ ,  $k_2 = 1.98 \pm 0.06 \times 10^{-3} \text{ min}^{-1}$ ,  $\epsilon_{\text{A}} = 610.9 \pm 0.5 \text{ M}^{-1}\text{cm}^{-1}$ ,  $\epsilon_{\text{B}} = 578.5 \pm 1.4 \text{ M}^{-1}\text{cm}^{-1}$ ,  $\epsilon_{\text{C}} = 488.8 \pm 1.0 \text{ M}^{-1}\text{cm}^{-1}$ ,  $\chi^2 = 1.72 \times 10^{-6}$ , and  $R = 0.99977$ . See eq. 1 in the Experimental Section for the mathematical expression used.



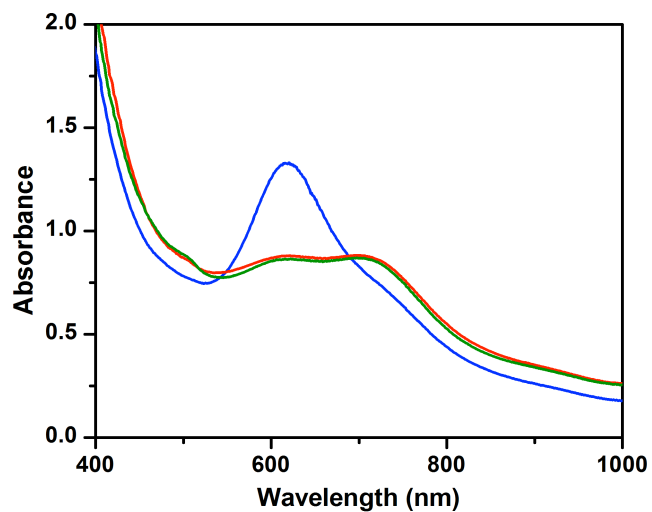

**Figure S6.** UV-vis spectra of solutions from reactions of 0.5 mM **2** with (1) 0.5 mM H<sub>2</sub>O<sub>2</sub> (red solid line), (2) 0.5 mM D<sub>2</sub>O<sub>2</sub> + 50 mM D<sub>2</sub>O (green solid line), or (3) 0.5 mM H<sub>2</sub>O<sub>2</sub> + 50 mM H<sub>2</sub>O (blue solid line).

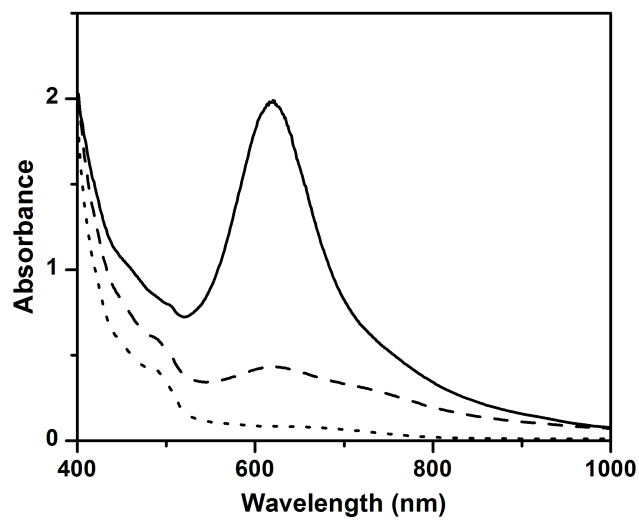

**Figure S7.** UV-vis spectra of 0.5 mM **2** in acetone (dotted line) and after reaction with 1.0 mM  $\text{H}_2\text{O}_2$  at  $-40\text{ }^\circ\text{C}$  for 30 s (dashed line) and 1,000 s (solid). In the dashed line spectrum, an absorption feature at 705 nm can be discerned that shows some formation of intermediate **4**, which reacts with residual  $\text{H}_2\text{O}_2$  to form  $\{\text{Fe}^{\text{III}}\text{Fe}^{\text{IV}}(\mu\text{-O})_2\}^{3+}$  (**7**,  $\lambda_{\text{max}} = 620\text{ nm}$ ). From the solid line we compute a 75% yield of **7** from **2**.

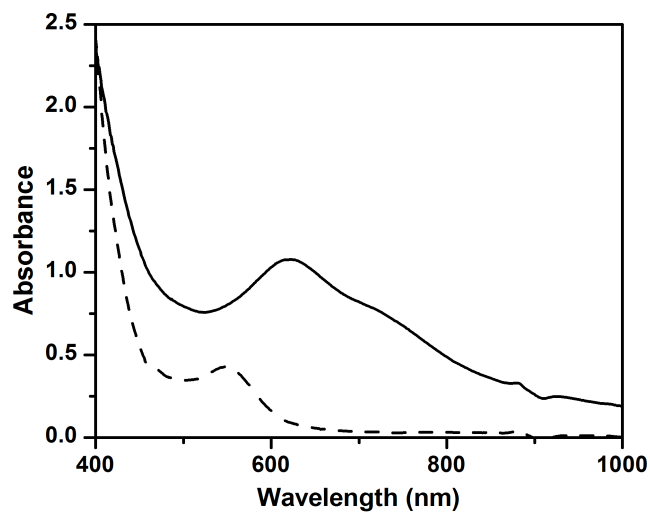

**Figure S8.** UV-vis spectra of 0.5 mM **2** in 3:1 CH<sub>2</sub>Cl<sub>2</sub>/CH<sub>3</sub>CN (dotted line) and 90 s after reaction with 0.5 mM H<sub>2</sub>O<sub>2</sub> (solid line) at -40 °C. These data show that a significant amount of **7** forms in the reaction of **2** with H<sub>2</sub>O<sub>2</sub> in 3:1 CH<sub>2</sub>Cl<sub>2</sub>/CH<sub>3</sub>CN, compared to the observed clean formation of **4** in pure CH<sub>3</sub>CN.
